# Supplementary material
Source: PubMed Central journal article supplement (PMC4615293)

Supplemental Figure 4, Brugman *et al.*

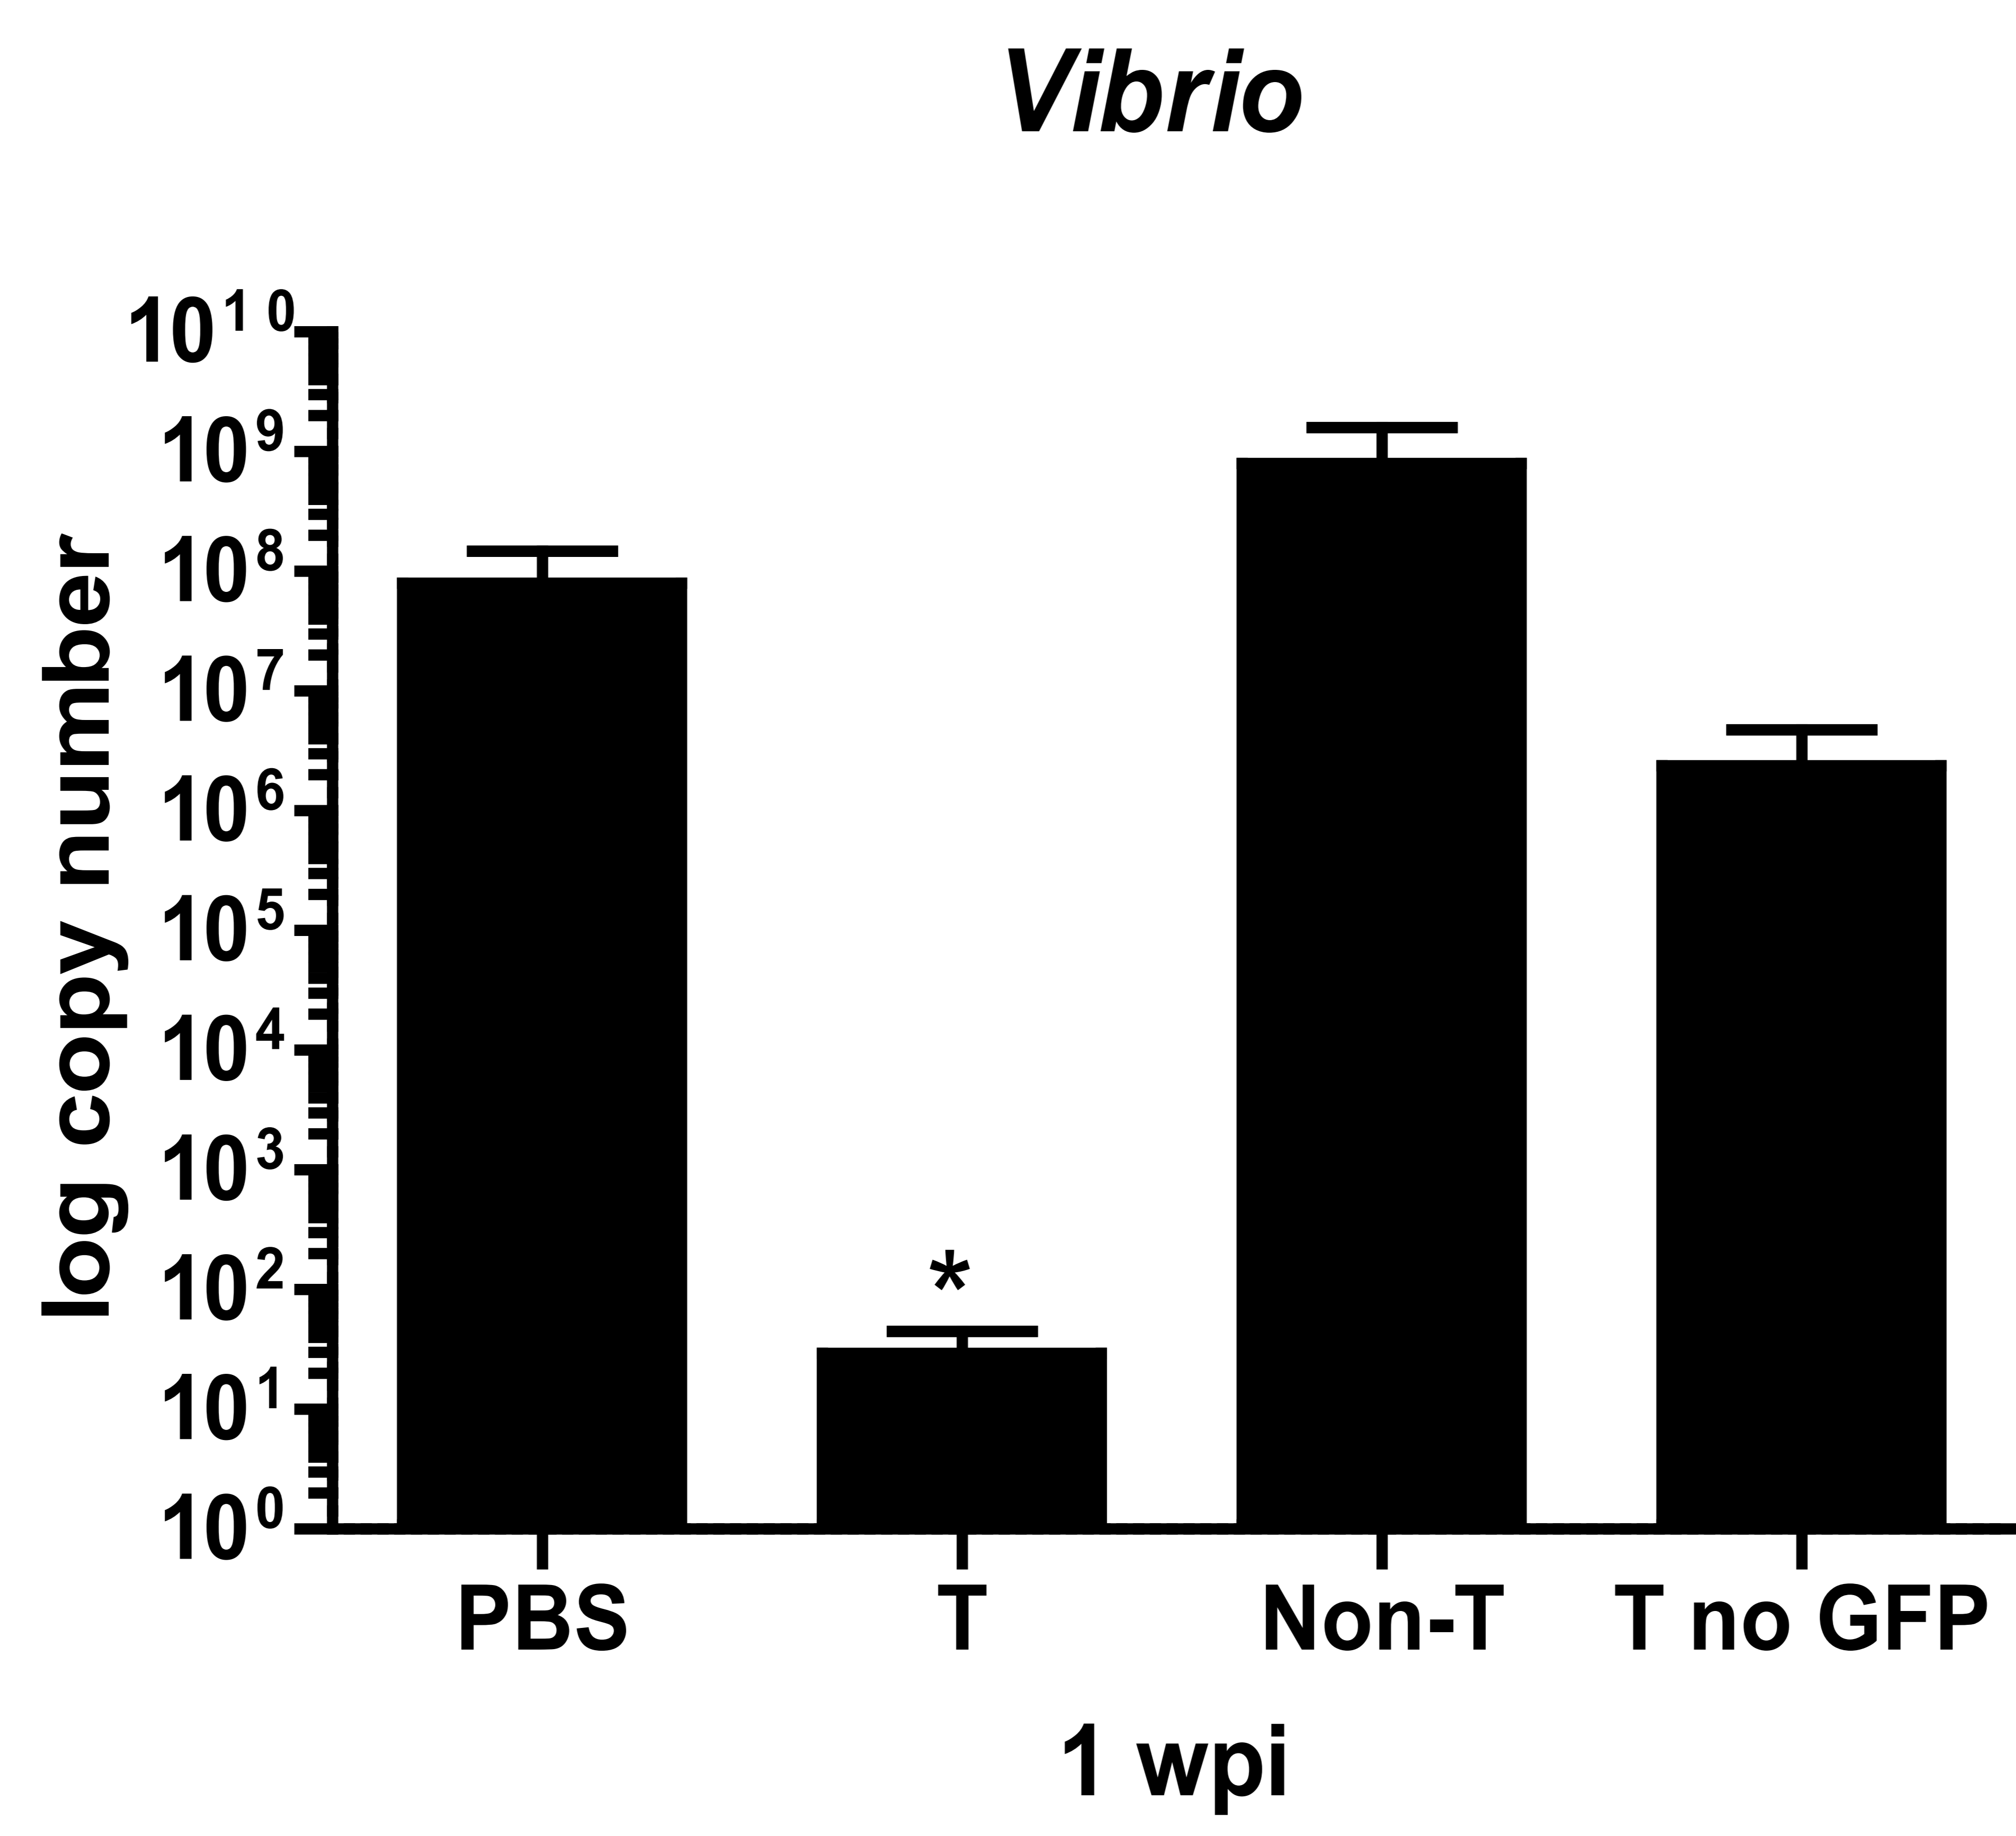

Supplement: kgmi-05-06-972228-s003.pdf [file kgmi-05-06-972228-s003.pdf]

# Supplemental Figure 2, Brugman *et al.*

A

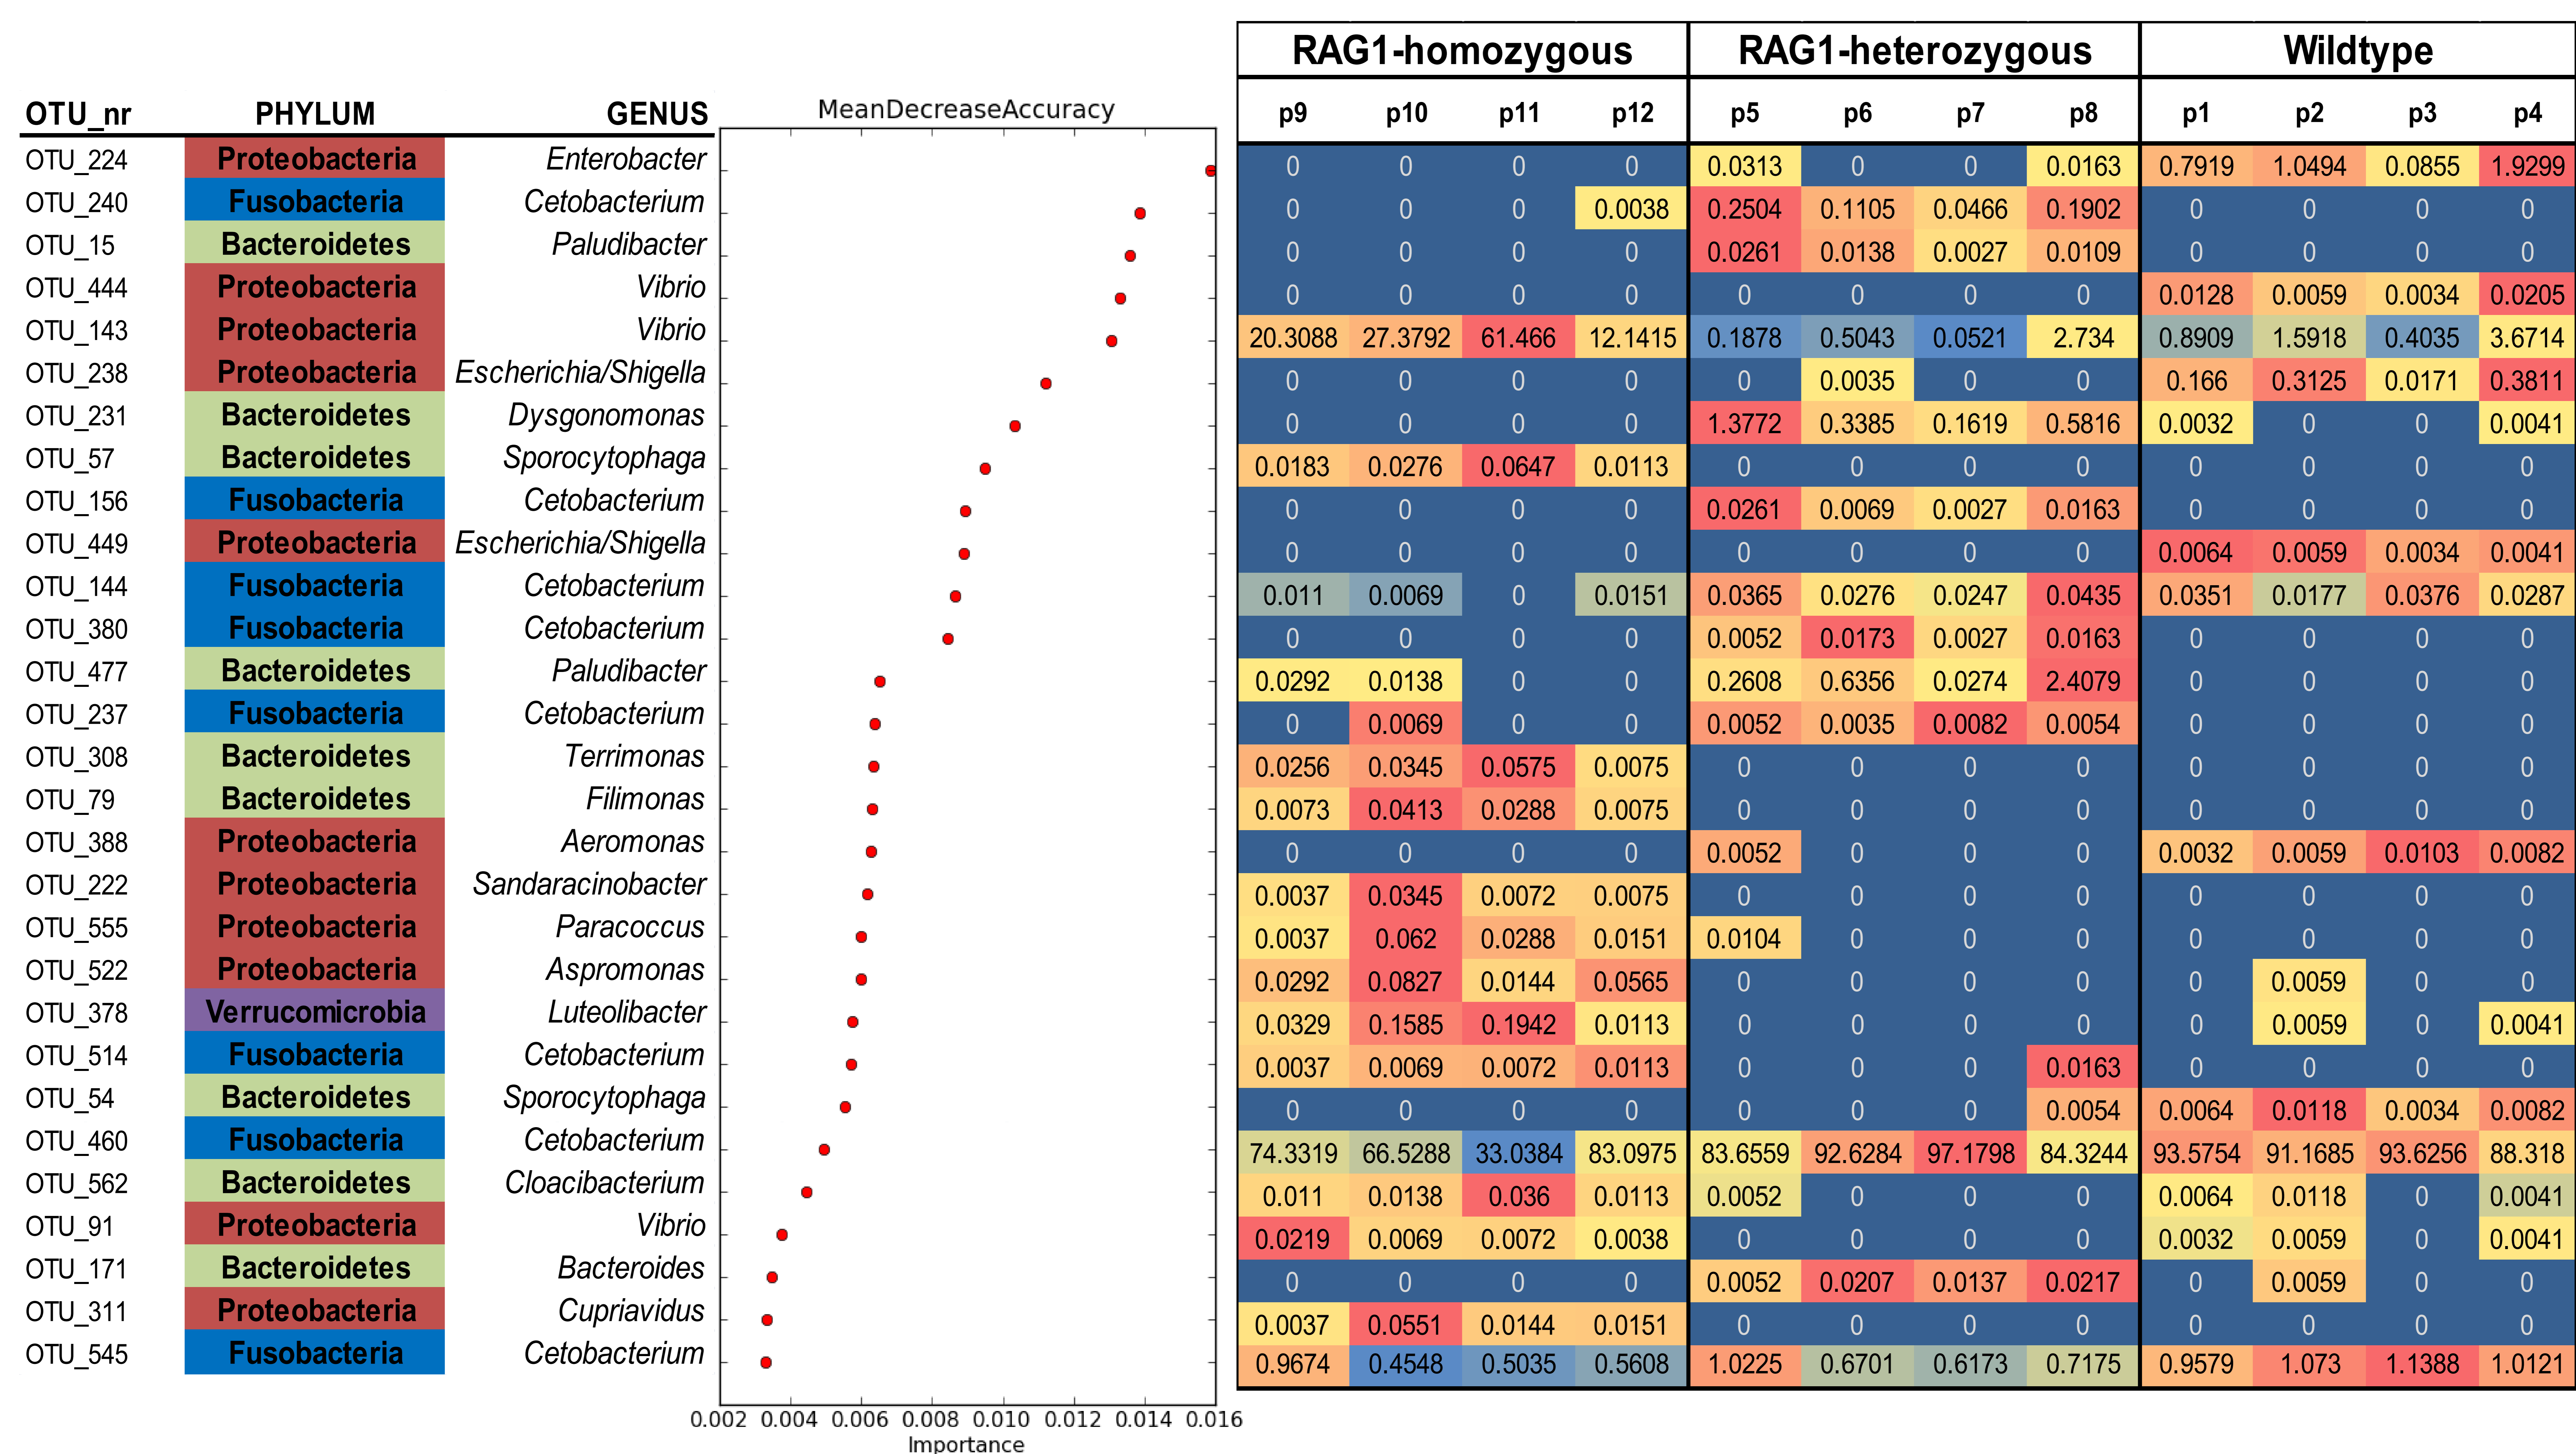

Supplement: kgmi-05-06-972228-s005.pdf [file kgmi-05-06-972228-s005.pdf]
